# Supplementary material
Source: ML conference proceedings conference paper supplement (https://openaccess.thecvf.com/content/ICCV2023/html/Dinsdale_SFHarmony_Source_Free_ICCV_2023_paper.html)
Supplement: Supplementary file 1 [file Dinsdale_SFHarmony_Source_Free_ICCV_2023_supplemental.zip]

| Method                      | Characteristic |                |                   |                 |                            | Site 1 (Source) Accuracy |                |                 | Site 2 Accuracy |                |                 | Site 3 Accuracy |                |                 | Site 4 Accuracy |                |                 | Site 5 Accuracy |                |                 | Average       |                |                 | Average across target site |                |                 |
|-----------------------------|----------------|----------------|-------------------|-----------------|----------------------------|--------------------------|----------------|-----------------|-----------------|----------------|-----------------|-----------------|----------------|-----------------|-----------------|----------------|-----------------|-----------------|----------------|-----------------|---------------|----------------|-----------------|----------------------------|----------------|-----------------|
|                             | Source Data?   | Target Labels? | Centralised Data? | Multiple Sites? | Information Shared         | Batchsize = 5            | Batchsize = 50 | Batchsize = 500 | Batchsize = 5   | Batchsize = 50 | Batchsize = 500 | Batchsize = 5   | Batchsize = 50 | Batchsize = 500 | Batchsize = 5   | Batchsize = 50 | Batchsize = 500 | Batchsize = 5   | Batchsize = 50 | Batchsize = 500 | Batchsize = 5 | Batchsize = 50 | Batchsize = 500 | Batchsize = 5              | Batchsize = 50 | Batchsize = 500 |
| Source Model                | y              | n              | n                 | n               | via                        | 87.45                    | 85.08          | 83.70           | 70.66           | 78.83          | 81.66           | 78.45           | 78.75          | 71.66           | 79.79           | 81.91          | 70.62           | 76.37           | 79.00          | 89.54           | 78.54         | 80.71          | 71.44           | 76.32                      | 79.62          | 88.37           |
| Source Model Smoothed       | y              | n              | n                 | n               | via                        | 76.41                    | 77.41          | 87.75           | 70.79           | 59.90          | 63.54           | 72.54           | 63.54          | 70.91           | 74.83           | 63.41          | 79.71           | 70.79           | 61.41          | 76.91           | 73.07         | 65.13          | 75.76           | 72.24                      | 62.07          | 72.77           |
| Source Model                | y              | n              | n                 | n               | via                        | 87.45                    | 87.45          | 87.45           | 70.66           | 70.66          | 70.66           | 78.45           | 78.45          | 78.45           | 79.79           | 79.79          | 79.79           | 76.37           | 76.37          | 76.37           | 78.54         | 78.54          | 78.54           | 76.32                      | 76.32          | 76.32           |
| Centralised Training        | y              | y              | y                 | y               | All Data                   | 89.08                    | 92.50          | 92.71           | 93.95           | 91.75          | 92.25           | 87.83           | 90.41          | 89.67           | 90.67           | 93.00          | 92.75           | 86.16           | 80.58          | 88.95           | 88.34         | 91.65          | 91.27           | 88.15                      | 91.44          | 90.91           |
| Finetune                    | n              | y              | n                 | n               | Model Weights              | 85.08                    | 87.45          | 83.75           | 89.50           | 89.66          | 83.62           | 89.25           | 89.66          | 84.21           | 88.66           | 88.29          | 83.16           | 88.25           | 88.41          | 81.54           | 88.15         | 88.69          | 83.26           | 88.92                      | 89.01          | 83.13           |
| FedAvg                      | y              | y              | n                 | y               | Model Weights              | 89.75                    | 91.25          | 85.04           | 84.41           | 71.95          | 84.33           | 84.95           | 84.37          | 71.96           | 86.87           | 87.58          | 81.71           | 83.70           | 88.41          | 81.50           | 85.94         | 84.71          | 76.91           | 84.98                      | 83.08          | 74.88           |
| FedProx                     | y              | y              | n                 | y               | Model Weights              | 78.42                    | 80.71          | 87.42           | 71.96           | 57.13          | 55.08           | 75.04           | 72.09          | 78.79           | 74.20           | 72.67          | 81.04           | 74.21           | 77.63          | 82.75           | 74.77         | 72.05          | 77.02           | 73.85                      | 69.88          | 74.42           |
| FADA                        | y              | y              | n                 | y               | Model Weights + Embeddings | 88.45                    | 88.41          | 87.66           | 84.08           | 74.37          | 72.08           | 85.70           | 79.50          | 78.95           | 88.08           | 83.08          | 91.41           | 86.38           | 84.50          | 82.91           | 86.54         | 81.97          | 80.60           | 86.06                      | 80.36          | 78.84           |
| FADA Unsupervised           | y              | n              | n                 | y               | Model Weights + Embeddings | 84.62                    | 84.96          | 84.54           | 81.12           | 75.16          | 73.58           | 81.62           | 73.66          | 74.54           | 82.08           | 76.70          | 76.41           | 79.00           | 73.37          | 73.58           | 81.69         | 76.77          | 76.53           | 80.96                      | 74.72          | 74.53           |
| FedHarmony                  | y              | y              | n                 | y               | Model Weights + Statistics | 80.41                    | 84.71          | 84.92           | 80.83           | 76.54          | 72.04           | 85.08           | 80.00          | 77.67           | 88.29           | 82.29          | 80.17           | 87.66           | 80.92          | 80.04           | 86.45         | 80.89          | 78.97           | 85.47                      | 79.94          | 77.48           |
| FedHarmony Unsupervised     | y              | n              | n                 | y               | Model Weights + Statistics | 84.54                    | 84.83          | 84.33           | 80.50           | 73.38          | 74.04           | 80.46           | 73.04          | 73.79           | 83.75           | 76.21          | 75.83           | 78.13           | 73.17          | 73.00           | 81.47         | 76.12          | 76.20           | 80.71                      | 73.95          | 74.17           |
| Deep CORAL                  | y              | y              | y                 | n               | All Data                   | 85.08                    | 85.08          | 85.08           | 87.33           | 84.41          | 82.33           | 86.12           | 85.58          | 86.00           | 85.00           | 86.25          | 84.58           | 86.20           | 85.33          | 83.04           | 85.95         | 85.33          | 84.21           | 86.16                      | 85.39          | 83.99           |
| Deep CORAL Unsupervised     | y              | n              | n                 | n               | Model Weights + Embeddings | 85.08                    | 85.08          | 85.08           | 79.66           | 83.00          | 81.91           | 84.62           | 85.70          | 85.95           | 80.92           | 82.45          | 82.29           | 81.87           | 83.00          | 83.04           | 82.43         | 83.85          | 83.65           | 81.77                      | 83.54          | 83.30           |
| Min Entropy                 | n              | n              | n                 | n               | Model Weights              | 85.08                    | 85.08          | 85.08           | 84.54           | 83.16          | 84.25           | 82.04           | 83.70          | 84.00           | 10.79           | 82.87          | 83.54           | 20.50           | 82.88          | 82.91           | 82.59         | 83.54          | 83.96           | 81.97                      | 83.15          | 83.88           |
| SHOT - without smoothing    | n              | n              | n                 | n               | Model weights              | 85.08                    | 85.08          | 85.08           | 84.66           | 84.75          | 87.20           | 84.16           | 82.50          | 86.75           | 86.38           | 82.58          | 83.45           | 84.00           | 83.08          | 84.50           | 86.96         | 83.60          | 85.40           | 82.30                      | 83.23          | 85.48           |
| SHOT (initial model bs 5)   | n              | n              | n                 | n               | Model Weights              | 76.41                    | 76.41          | 76.41           | 72.79           | 75.54          | 75.13           | 73.13           | 75.16          | 74.87           | 70.63           | 74.25          | 74.04           | 70.08           | 70.83          | 72.61           | 74.44         | 74.61          | 71.66           | 73.95                      | 74.17          |                 |
| SHOT (initial model bs 500) | n              | n              | n                 | n               | Model weights              | 87.75                    | 87.75          | 87.75           | 82.50           | 84.33          | 86.37           | 83.75           | 85.45          | 85.54           | 81.25           | 83.13          | 83.83           | 80.25           | 82.75          | 82.88           | 83.10         | 84.68          | 85.27           | 81.94                      | 83.91          | 84.65           |
| USFAN                       | n              | n              | n                 | n               | Model weights              | 89.08                    | 89.66          | 89.54           | 11.83           | 75.38          | 82.66           | 6.00            | 80.38          | 85.71           | 8.70            | 77.50          | 80.66           | 19.08           | 77.25          | 81.41           | 26.94         | 79.83          | 83.80           | 11.40                      | 77.63          | 82.61           |
| gSFDA                       | n              | n              | n                 | n               | Model Weights              | 57.42                    | 86.95          | 86.63           | 56.71           | 87.38          | 85.79           | 52.79           | 88.04          | 84.58           | 54.33           | 83.75          | 83.00           | 81.58           | 83.25          | 83.38           | 80.57         | 85.87          | 84.67           | 61.35                      | 85.60          | 84.19           |
| Direct Fit                  | n              | n              | n                 | n               | Model Weights + Statistics | 85.08                    | 85.08          | 85.08           | 66.16           | 74.45          | 87.62           | 82.00           | 79.16          | 87.41           | 73.66           | 82.79          | 84.37           | 79.42           | 83.50          | 85.66           | 77.26         | 77.00          | 86.03           | 75.31                      | 74.08          | 86.27           |
| 1 GMM Component             | n              | n              | n                 | n               | Model Weights + Statistics | 85.08                    | 85.08          | 85.08           | 87.62           | 87.75          | 88.20           | 87.04           | 87.67          | 87.50           | 83.70           | 83.50          | 84.12           | 83.92           | 84.71          | 85.90           | 85.47         | 85.74          | 86.16           | 85.57                      | 85.91          | 86.43           |
| 2 GMM Components            | n              | n              | n                 | n               | Model Weights + Statistics | 85.08                    | 85.08          | 85.08           | 88.42           | 88.27          | 87.96           | 88.10           | 87.58          | 87.50           | 83.83           | 84.41          | 84.85           | 85.71           | 85.89          | 85.66           | 86.23         | 86.25          | 86.21           | 86.51                      | 86.54          | 86.49           |
| 3 GMM Components            | n              | n              | n                 | n               | Model Weights + Statistics | 85.08                    | 85.08          | 85.08           | 88.00           | 87.79          | 87.54           | 87.48           | 87.50          | 87.45           | 84.58           | 83.50          | 84.74           | 85.90           | 84.61          | 84.98           | 86.21         | 85.70          | 85.96           | 86.49                      | 85.85          | 86.18           |
